# Supplementary material for: Biocontrol Potential of Antagonistic Yeasts on In Vitro and In Vivo Aspergillus Growth and Its AFB1 Production
Source: MDPI journal article supplement (doi:10.3390/toxins15060402), 2023-06-19
Supplement: s1 [file s1]

# Supplementary Materials: Biocontrol Potential of Antagonistic Yeasts on In Vitro and In Vivo *Aspergillus* Growth and Its AFB<sub>1</sub> Production

Dilara Nur Dikmetas, Hayrettin Özer and Funda Karbancıoglu-Guler

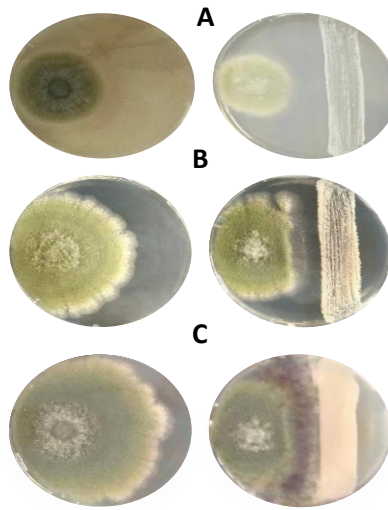

**Figure S1.** *In vitro* test of antagonism of a yeast isolate against *A. flavus* using the dual culture technique on PDA plates after 3 (**A**), 5 (**B**) and 7 (**C**) days of incubation with the control and DN-HS yeast interaction.
